# Supplementary material for: Microorganisms Move a Short Distance into an Almond Orchard from an Adjacent Upwind Poultry Operation
Source: PubMed Central journal article supplement (PMC7376559; doi:10.1128/aem.00573-20), 2020-07-20
Supplement: AEM.00573-20-s0001.pdf [file AEM.00573-20-s0001.pdf]

Table S1. Wind speed (m/s), temperature (°C), and relative humidity (%) averaged across sampling locations in almond orchards<sup>a</sup> in 2013 and 2014.

| Orchard sampling period | Wind Speed (m/s) |                 |           | Temperature (°C) |            |            | Relative Humidity (%) |             |             |
|-------------------------|------------------|-----------------|-----------|------------------|------------|------------|-----------------------|-------------|-------------|
|                         | AP               | AC1             | AC2       | AP               | AC1        | AC2        | AP                    | AC1         | AC2         |
| <b>2013</b>             |                  |                 |           |                  |            |            |                       |             |             |
| March                   | 0.0 ± 0.0        | ND <sup>b</sup> | ND        | 15.3 ± 0.3       | ND         | ND         | 0.63 ± 0.03           | ND          | ND          |
| April                   | 0.5 ± 0.4        | ND              | ND        | 16.1 ± 0.3       | ND         | ND         | 0.73 ± 0.00           | ND          | ND          |
| May                     | 0.3 ± 0.2        | 0.2 ± 0.2       | ND        | 25.8 ± 1.3       | 20.8 ± 0.5 | ND         | 0.45 ± 0.03           | 0.54 ± 0.03 | ND          |
| June                    | 1.2 ± 0.8        | 1.7 ± 1.7       | ND        | 22.0 ± 1.5       | ND         | ND         | 0.50 ± 0.02           | 0.43 ± 0.01 | ND          |
| July                    | 1.0 ± 0.8        | 0.6 ± 0.7       | ND        | 21.1 ± 1.0       | 28.9 ± 1.3 | ND         | 0.62 ± 0.02           | 0.41 ± 0.02 | ND          |
| August                  | 0.6 ± 0.3        | 0.8 ± 0.4       | ND        | 16.5 ± .21       | 31.3 ± 0.4 | ND         | 0.76 ± 0.01           | 0.41 ± 0.02 | ND          |
| Mid-harvest             | 0.7 ± 0.7        | 0.8 ± 0.5       | ND        | 23.9 ± 1.4       | 29.5 ± 2.0 | ND         | 0.31 ± 0.02           | 0.34 ± 0.04 | ND          |
| <b>2014</b>             |                  |                 |           |                  |            |            |                       |             |             |
| June                    | 0.5 ± 0.3        | 0.9 ± 0.5       | 0.6 ± 0.3 | 29.1 ± 1.4       | 30.9 ± 0.5 | 26.8 ± 2.5 | 0.38 ± 0.01           | 0.34 ± 0.03 | 0.41 ± 0.05 |
| July                    | 1.3 ± 0.8        | 0.7 ± 0.3       | 0.7 ± 0.2 | 27.0 ± 2.1       | 32.6 ± 1.7 | 27.1 ± 2.2 | 0.53 ± 0.05           | 0.44 ± 0.03 | 0.55 ± 0.04 |

<sup>a</sup> Orchard designations: AP, Almond Poultry; AC1, Almond Control 1; AC2, Almond Control 2.

<sup>b</sup> ND, not determined; AC1 not sampled until May 2013, and AC2 not sampled until 2014.

Table S2. Distribution of microbial populations in air by aerobic plate count (log CFU/m<sup>3</sup> air) and by enrichment and isolation results (*E. coli*, other coliforms) for samples from almond orchards by row (0 m, 60 m, 120 m) and column (A, B, C) in 2013, *n* = 3.

| Month       | Row   | Air sample aerobic plate count (log CFU/m <sup>3</sup> air) and enrichment results ( <i>E</i> , <i>C</i> ) <sup>a</sup> |                 |                 |                            |               |               |
|-------------|-------|-------------------------------------------------------------------------------------------------------------------------|-----------------|-----------------|----------------------------|---------------|---------------|
|             |       | Orchard AP                                                                                                              |                 |                 | Orchard AC1                |               |               |
|             |       | Column                                                                                                                  |                 |                 | Column                     |               |               |
|             |       | A                                                                                                                       | B               | C               | A                          | B             | C             |
| March       | 0 m   | 2.3 <i>C</i>                                                                                                            | 2.4 <i>C</i>    | 2.1 <i>C</i>    | ND <sup>b</sup>            | ND            | ND            |
|             | 60 m  | 2.3 <i>C</i>                                                                                                            | 2.7 <i>n</i>    | 2.0 <i>C</i>    | ND                         | ND            | ND            |
|             | 120 m | 2.3 <i>n</i>                                                                                                            | 2.3 <i>n</i>    | 2.0 <i>n</i>    | ND                         | ND            | ND            |
| April       | 0 m   | 1.3 <i>E,C</i>                                                                                                          | 1.2 <i>E,C</i>  | 1.5 <i>E,C</i>  | ND                         | ND            | ND            |
|             | 60 m  | 1.1 <i>E,C</i>                                                                                                          | 1.2 <i>E,C</i>  | 1.5 <i>C</i>    | ND                         | ND            | ND            |
|             | 120 m | 1.2 <i>E</i>                                                                                                            | 1.0 <i>E</i>    | 1.6 <i>E,C</i>  | ND                         | ND            | ND            |
| May         | 0 m   | 2.4 <i>C</i>                                                                                                            | 2.4 <i>C</i>    | 2.3 <i>C</i>    | 2.1 <i>C</i>               | 2.2 <i>C</i>  | 2.3 <i>C</i>  |
|             | 60 m  | 2.2 <i>C</i>                                                                                                            | 2.3 <i>C</i>    | 2.4 <i>C</i>    | 2.2 <i>C</i>               | 2.2 <i>C</i>  | 2.4 <i>C</i>  |
|             | 120 m | 2.2 <i>C</i>                                                                                                            | 2.2 <i>C</i>    | 2.2 <i>C</i>    | 2.1 <i>C</i>               | 2.2 <i>C</i>  | 2.1 <i>C</i>  |
| June        | 0 m   | 2.7 <i>E,C</i>                                                                                                          | 2.4 <i>E,C</i>  | 2.4 <i>E,C</i>  | >3.4 <sup>c</sup> <i>C</i> | >3.4 <i>C</i> | >3.4 <i>C</i> |
|             | 60 m  | 2.5 <i>E,C</i>                                                                                                          | 2.3 <i>C</i>    | 2.4 <i>C</i>    | >3.4 <i>C</i>              | >3.4 <i>C</i> | >3.4 <i>C</i> |
|             | 120 m | 2.9 <i>C</i>                                                                                                            | 2.3 <i>E,C</i>  | 2.4 <i>E,C</i>  | >3.4 <i>C</i>              | >3.4 <i>C</i> | >3.4 <i>C</i> |
| July        | 0 m   | 3.0 <i>E</i>                                                                                                            | >3.4 <i>C</i>   | 3.3 <i>n</i>    | 2.5 <i>C</i>               | 2.5 <i>C</i>  | 2.5 <i>C</i>  |
|             | 60 m  | >3.4 <i>C</i>                                                                                                           | 3.1 <i>n</i>    | 3.0 <i>C</i>    | 2.6 <i>C</i>               | 2.5 <i>C</i>  | 2.6 <i>C</i>  |
|             | 120 m | 2.7 <i>C</i>                                                                                                            | 2.5 <i>C</i>    | 2.4 <i>C</i>    | 2.4 <i>C</i>               | 2.6 <i>C</i>  | 2.6 <i>C</i>  |
| August      | 0 m   | 3.0 <i>C</i>                                                                                                            | 2.6 <i>C</i>    | NC <sup>d</sup> | 2.3 <i>n</i>               | 2.5 <i>C</i>  | 2.3 <i>C</i>  |
|             | 60 m  | 2.9 <i>C</i>                                                                                                            | 2.9 <i>C</i>    | NC              | 2.2 <i>C</i>               | 2.2 <i>C</i>  | 2.2 <i>C</i>  |
|             | 120 m | 2.7 <i>C</i>                                                                                                            | 2.4 <i>C</i>    | NC              | 2.4 <i>C</i>               | 2.3 <i>C</i>  | 2.4 <i>C</i>  |
| Mid-harvest | 0 m   | >3.4 <i>E,C</i>                                                                                                         | >3.4 <i>E,C</i> | >3.4 <i>C</i>   | >3.4 <i>C</i>              | >3.4 <i>C</i> | >3.4 <i>C</i> |
|             | 60 m  | >3.4 <i>C</i>                                                                                                           | >3.4 <i>C</i>   | >3.4 <i>C</i>   | >3.4 <i>C</i>              | >3.4 <i>C</i> | >3.4 <i>C</i> |
|             | 120 m | >3.4 <i>C</i>                                                                                                           | >3.4 <i>C</i>   | >3.4 <i>C</i>   | >3.4 <i>C</i>              | >3.4 <i>C</i> | 3.2 <i>C</i>  |

<sup>a</sup> Within cells, letters after aerobic plate count indicate presence of *E. coli* (*E*), other coliforms (*C*), or negative (*n*) results after enrichment and isolation on ChromECC.

<sup>b</sup> ND, not determined; AC1 not sampled until May 2013, and AC2 not sampled until 2014.

<sup>c</sup> Upper limit of detection (ULOD) was 3.4 log CFU/m<sup>3</sup> air.

<sup>d</sup> NC, sample not collected.

Table S3. Distribution of microbial populations in air by aerobic plate count (log CFU/m<sup>3</sup> air) and by enrichment and isolation results (*E. coli*, other coliforms) for samples from almond orchards by row (0 m, 60 m, 120 m) and column (A, C) in 2014, n = 3

|       |       | Microbial population in air (log CFU/m <sup>3</sup> ) |                 |               |               |               |               |
|-------|-------|-------------------------------------------------------|-----------------|---------------|---------------|---------------|---------------|
|       |       | Orchard AP                                            |                 | Orchard AC1   |               | Orchard AC2   |               |
|       |       | Column                                                |                 | Column        |               | Column        |               |
| Month | Row   | A                                                     | C               | A             | C             | A             | C             |
| June  | 0 m   | >3.4 <i>E,C</i> <sup>a,b</sup>                        | >3.4 <i>E,C</i> | >3.4 <i>C</i> | >3.4 <i>C</i> | 3.3 <i>C</i>  | 3.2 <i>C</i>  |
|       | 60 m  | >3.4 <i>C</i>                                         | >3.4 <i>C</i>   | >3.4 <i>C</i> | >3.4 <i>C</i> | 3.2 <i>C</i>  | 3.3 <i>C</i>  |
|       | 120 m | >3.4 <i>C</i>                                         | >3.4 <i>C</i>   | >3.4 <i>C</i> | >3.4 <i>n</i> | 2.6 <i>C</i>  | 3.0 <i>E</i>  |
| July  | 0 m   | >3.4 <i>E,C</i>                                       | >3.4 <i>C</i>   | 3.2 <i>C</i>  | >3.4 <i>C</i> | >3.4 <i>C</i> | 3.2 <i>C</i>  |
|       | 60 m  | >3.4 <i>E,C</i>                                       | >3.4 <i>C</i>   | >3.4 <i>C</i> | 3.0 <i>C</i>  | >3.4 <i>n</i> | >3.4 <i>C</i> |
|       | 120 m | >3.4 <i>C</i>                                         | >3.4 <i>C</i>   | >3.4 <i>C</i> | 2.8 <i>C</i>  | >3.4 <i>C</i> | >3.4 <i>C</i> |

<sup>a</sup> Within cells, letters after aerobic plate count indicate presence of *E. coli* (*E*), other coliforms (*C*), or negative (*n*) results after enrichment and isolation on ChromECC.

<sup>b</sup> ULOD was 3.4 log CFU/m<sup>3</sup>.

Table S4. Dominant bacterial phyla in the orchard microbial community of three almond orchards (AP, AC1, and AC2) as determined by second-generation sequencing

|                |                       | Relative abundance (%) of dominant bacterial phyla in orchard samples at sampling times |          |           |                 |           |                     |           |          |           |           |           |                    |           |           |                     |
|----------------|-----------------------|-----------------------------------------------------------------------------------------|----------|-----------|-----------------|-----------|---------------------|-----------|----------|-----------|-----------|-----------|--------------------|-----------|-----------|---------------------|
| Orchard sample | Bacterial phylum      | AP                                                                                      |          |           |                 |           |                     | AC1       |          |           |           |           |                    | AC2       |           |                     |
|                |                       | July 2013                                                                               | Aug 2013 | Sept 2013 | June 2014       | July 2014 | Avg                 | July 2013 | Aug 2013 | Sept 2013 | June 2014 | July 2014 | Avg                | June 2014 | July 2014 | Avg                 |
| Soil           | <i>Actinobacteria</i> | 31.84                                                                                   | 22.77    | 27.63     | 23.89           | 24.60     | 26.15 <sup>Aa</sup> | 29.99     | 21.62    | 23.88     | 19.89     | 16.92     | 22.46 <sup>B</sup> | 21.42     | 26.56     | 23.99 <sup>AB</sup> |
|                | <i>Bacteroidetes</i>  | 7.33                                                                                    | 5.13     | 7.22      | 9.29            | 9.01      | 7.60                | 5.74      | 4.07     | 5.45      | 9.28      | 12.04     | 7.316              | 6.65      | 5.96      | 6.31                |
|                | <i>Chloroflexi</i>    | 6.68                                                                                    | 14.39    | 5.92      | 5.95            | 6.16      | 7.82 <sup>B</sup>   | 9.19      | 15.36    | 15.04     | 8.18      | 7.50      | 11.05 <sup>A</sup> | 12.37     | 7.62      | 10.00 <sup>AB</sup> |
|                | <i>Firmicutes</i>     | 7.42                                                                                    | 5.97     | 13.50     | 8.26            | 11.30     | 9.29 <sup>A</sup>   | 4.31      | 7.21     | 4.22      | 5.15      | 4.80      | 5.138 <sup>B</sup> | 7.99      | 9.41      | 8.70 <sup>A</sup>   |
|                | <i>Proteobacteria</i> | 29.91                                                                                   | 21.49    | 32.66     | 32.01           | 30.33     | 29.28               | 31.68     | 21.31    | 29.16     | 32.57     | 34.49     | 29.84              | 26.94     | 34.33     | 30.64               |
| Phyllo-sphere  | <i>Actinobacteria</i> | 21.06                                                                                   | 29.39    | 25.6      | 22.21           | 15.34     | 22.72 <sup>A</sup>  | 10.69     | 13.40    | 20.3      | 11.95     | 8.92      | 13.05 <sup>B</sup> | 15.80     | 9.98      | 12.89               |
|                | <i>Bacteroidetes</i>  | 15.90                                                                                   | 5.48     | 15.3      | 11.88           | 17.68     | 13.25 <sup>B</sup>  | 21.33     | 13.23    | 11.7      | 22.69     | 23.51     | 18.49 <sup>B</sup> | 15.96     | 23.11     | 19.54               |
|                | <i>Chloroflexi</i>    | 0.40                                                                                    | 0.90     | 0.7       | 0.79            | 0.76      | 0.71 <sup>B</sup>   | 0.27      | 1.14     | 2.60      | 1.42      | 0.73      | 1.232              | 0.82      | 0.74      | 0.78                |
|                | <i>Firmicutes</i>     | 23.33                                                                                   | 41.54    | 8.10      | 27.36           | 19.99     | 24.06 <sup>A</sup>  | 6.58      | 23.11    | 8.10      | 10.43     | 7.38      | 11.12              | 5.31      | 7.60      | 6.46                |
|                | <i>Proteobacteria</i> | 36.04                                                                                   | 20.83    | 45.6      | 34.94           | 42.83     | 36.05 <sup>B</sup>  | 55.91     | 46.48    | 52.4      | 50.70     | 56.66     | 52.43              | 58.46     | 55.36     | 56.91               |
| Air            | <i>Actinobacteria</i> | 0.48                                                                                    | 1.06     | 0.90      | ND <sup>b</sup> | ND        | 0.81 <sup>A</sup>   | 0.46      | 0.48     | 0.70      | ND        | ND        | 0.54               | ND        | ND        |                     |
|                | <i>Bacteroidetes</i>  | 0.07                                                                                    | 0.07     | 0.20      | ND              | ND        | 0.11                | 0.09      | 0.08     | 0.20      | ND        | ND        | 0.12               | ND        | ND        |                     |
|                | <i>Chloroflexi</i>    | 0.06                                                                                    | 0.06     | 0.10      | ND              | ND        | 0.07                | 0.07      | 0.07     | 0.10      | ND        | ND        | 0.08               | ND        | ND        |                     |
|                | <i>Firmicutes</i>     | 61.03                                                                                   | 65.67    | 25.90     | ND              | ND        | 50.87               | 49.20     | 65.37    | 21.20     | ND        | ND        | 45.25              | ND        | ND        |                     |
|                | <i>Proteobacteria</i> | 38.27                                                                                   | 33.06    | 72.60     | ND              | ND        | 47.98               | 50.06     | 33.92    | 77.60     | ND        | ND        | 53.86              | ND        | ND        |                     |

<sup>a</sup> Within rows for orchard sample type, phylum prevalence averages with different uppercase letters are significantly different ( $P < 0.05$ ).

<sup>b</sup> ND, not determined.

Table S5. Dominant bacterial families in the orchard microbial community of three almond orchards (AP, AC1, and AC2) as determined by second-generation sequencing

|                |                            | Relative abundance (%) of dominant bacterial families in orchard samples at sampling times |          |           |           |           |                    |           |          |           |           |           |                    |           |           |                    |
|----------------|----------------------------|--------------------------------------------------------------------------------------------|----------|-----------|-----------|-----------|--------------------|-----------|----------|-----------|-----------|-----------|--------------------|-----------|-----------|--------------------|
| Orchard sample | Bacterial family           | AP                                                                                         |          |           |           |           |                    | AC1       |          |           |           |           |                    | AC2       |           |                    |
|                |                            | July 2013                                                                                  | Aug 2013 | Sept 2013 | June 2014 | July 2014 | Avg                | July 2013 | Aug 2013 | Sept 2013 | June 2014 | July 2014 | Avg                | June 2014 | July 2014 | Avg                |
| Soil           | <i>Bacillaceae</i>         | 1.34                                                                                       | 1.04     | 6.48      | 5.34      | 7.45      | 4.33 <sup>Ad</sup> | 1.68      | 3.19     | 2.80      | 3.35      | 3.01      | 2.81 <sup>B</sup>  | 4.80      | 5.33      | 5.07 <sup>A</sup>  |
|                | <i>Cytophagaceae</i>       | 1.94                                                                                       | 1.94     | 2.61      | 2.41      | 1.98      | 2.18 <sup>B</sup>  | 2.27      | 1.43     | 2.42      | 3.18      | 4.31      | 2.72 <sup>A</sup>  | 2.74      | 2.43      | 2.59 <sup>AB</sup> |
|                | <i>Enterobacteriaceae</i>  | 0.72                                                                                       | 0.69     | 2.14      | 0.18      | 0.19      | 0.78 <sup>A</sup>  | 1.04      | 0.67     | 1.47      | 0.19      | 0.18      | 0.71 <sup>AB</sup> | 0.22      | 0.34      | 0.28 <sup>B</sup>  |
|                | <i>Methylobacteriaceae</i> | 0.32                                                                                       | 0.20     | 0.59      | 0.95      | 0.94      | 0.60 <sup>A</sup>  | 0.18      | 0.15     | 0.35      | 0.75      | 0.70      | 0.43 <sup>B</sup>  | 0.49      | 0.62      | 0.56 <sup>AB</sup> |
|                | <i>Microbacteriaceae</i>   | 1.33                                                                                       | 0.87     | 1.73      | 0.50      | 0.76      | 1.04 <sup>A</sup>  | 1.00      | 0.60     | 0.97      | 0.74      | 0.58      | 0.78 <sup>B</sup>  | 1.18      | 1.15      | 1.17 <sup>B</sup>  |
|                | <i>Micrococcaceae</i>      | 9.98                                                                                       | 4.49     | 7.64      | 6.36      | 7.07      | 7.11 <sup>A</sup>  | 4.03      | 4.09     | 3.45      | 4.51      | 4.16      | 4.05 <sup>B</sup>  | 6.14      | 7.45      | 6.80 <sup>A</sup>  |
|                | <i>Planococcaceae</i>      | 3.32                                                                                       | 2.20     | 2.05      | 0.06      | 0.07      | 1.54 <sup>A</sup>  | 1.34      | 2.07     | 0.78      | 0.42      | 0.40      | 1.00 <sup>B</sup>  | 1.00      | 0.99      | 1.00 <sup>B</sup>  |
|                | <i>Pseudomonadaceae</i>    | 0.84                                                                                       | 0.39     | 1.24      | 0.41      | 0.28      | 0.63 <sup>A</sup>  | 0.40      | 0.31     | 0.71      | 0.33      | 0.41      | 0.43 <sup>B</sup>  | 0.43      | 0.50      | 0.47 <sup>AB</sup> |
|                | <i>Sphingomonadaceae</i>   | 3.99                                                                                       | 2.19     | 3.65      | 8.85      | 10.29     | 5.79 <sup>AB</sup> | 3.34      | 2.00     | 3.12      | 8.08      | 7.13      | 4.73 <sup>B</sup>  | 6.38      | 8.39      | 7.39 <sup>A</sup>  |
|                | <i>Staphylococcaceae</i>   | 0.23                                                                                       | 0.07     | .0023     | 0.30      | 0.36      | 0.19 <sup>A</sup>  | 0.18      | 0.06     | .0005     | 0.21      | 0.20      | 0.13 <sup>B</sup>  | 0.24      | 0.33      | 0.29 <sup>A</sup>  |
| Phyllo-sphere  | <i>Bacillaceae</i>         | 6.12                                                                                       | 13.67    | 3.07      | 11.57     | 8.61      | 8.61               | 1.60      | 6.85     | 4.73      | 4.76      | 3.63      | 4.31               | 2.66      | 3.91      | 3.29               |
|                | <i>Cytophagaceae</i>       | 12.84                                                                                      | 4.70     | 13.07     | 9.04      | 13.69     | 10.67              | 17.18     | 11.47    | 9.60      | 18.82     | 19.98     | 15.41              | 13.03     | 18.46     | 15.75              |
|                | <i>Enterobacteriaceae</i>  | 1.17                                                                                       | 2.72     | 3.12      | 2.62      | 0.76      | 2.08               | 1.64      | 6.70     | 4.85      | 2.40      | 4.83      | 4.08               | 2.20      | 2.40      | 2.30               |
|                | <i>Methylobacteriaceae</i> | 7.02                                                                                       | 3.77     | 10.49     | 4.93      | 6.73      | 6.59               | 13.23     | 9.37     | 11.19     | 6.97      | 10.66     | 10.28              | 11.68     | 11.27     | 11.48              |
|                | <i>Microbacteriaceae</i>   | 3.38                                                                                       | 2.53     | 7.29      | 2.82      | 2.87      | 3.78               | 3.61      | 3.10     | 3.49      | 3.64      | 2.58      | 3.28               | 4.35      | 2.96      | 3.66               |
|                | <i>Micrococcaceae</i>      | 0.78                                                                                       | 1.41     | 3.07      | 1.12      | 1.06      | 1.49               | 0.48      | 1.27     | 3.00      | 1.20      | 0.77      | 1.34               | 1.04      | 0.88      | 0.96               |
|                | <i>Planococcaceae</i>      | 1.31                                                                                       | 2.95     | 0.71      | 0.68      | 0.83      | 1.30               | 1.41      | 4.83     | 0.97      | 0.81      | 0.73      | 1.75               | 0.48      | 0.70      | 0.59               |
|                | <i>Pseudomonadaceae</i>    | 1.89                                                                                       | 1.30     | 1.61      | 2.90      | 1.39      | 1.82               | 1.44      | 2.85     | 1.33      | 2.76      | 1.50      | 1.98               | 3.48      | 0.82      | 2.15               |

|     |                            |       |       |       |                 |       |       |       |       |       |       |       |             |       |       |       |
|-----|----------------------------|-------|-------|-------|-----------------|-------|-------|-------|-------|-------|-------|-------|-------------|-------|-------|-------|
|     | <i>Sphingomonadaceae</i>   | 14.49 | 6.83  | 18.39 | 15.92           | 22.37 | 15.60 | 22.57 | 15.56 | 16.58 | 23.35 | 25.88 | 20.79       | 27.41 | 25.16 | 26.29 |
|     | <i>Staphylococcaceae</i>   | 7.46  | 8.81  | 2.70  | 7.25            | 4.00  | 6.04  | 0.21  | 0.79  | .0013 | 0.49  | 0.48  | <b>0.39</b> | 0.35  | 0.41  | 0.38  |
| Air | <i>Bacillaceae</i>         | 15.17 | 8.86  | 8.42  | ND <sup>b</sup> | ND    | 10.82 | 3.40  | 3.85  | 8.13  | ND    | ND    | 5.13        | ND    | ND    |       |
|     | <i>Cytophagaceae</i>       | 0.05  | 0.06  | 0.12  | ND              | ND    | 0.08  | 0.07  | 0.06  | 0.14  | ND    | ND    | 0.09        | ND    | ND    |       |
|     | <i>Enterobacteriaceae</i>  | 31.30 | 21.13 | 57.64 | ND              | ND    | 36.69 | 40.49 | 26.60 | 52.82 | ND    | ND    | 39.97       | ND    | ND    |       |
|     | <i>Methylobacteriaceae</i> | 0.06  | 0.05  | 0.12  | ND              | ND    | 0.08  | 0.05  | 0.05  | 0.13  | ND    | ND    | 0.08        | ND    | ND    |       |
|     | <i>Microbacteriaceae</i>   | 0.03  | 0.03  | 0.09  | ND              | ND    | 0.05  | 0.03  | 0.03  | 0.09  | ND    | ND    | 0.05        | ND    | ND    |       |
|     | <i>Micrococcaceae</i>      | 0.15  | 0.78  | 0.21  | ND              | ND    | 0.38  | 0.11  | 0.17  | 0.22  | ND    | ND    | 0.17        | ND    | ND    |       |
|     | <i>Planococcaceae</i>      | 9.22  | 7.92  | 11.18 | ND              | ND    | 9.44  | 8.17  | 6.01  | 13.50 | ND    | ND    | 9.23        | ND    | ND    |       |
|     | <i>Pseudomonadaceae</i>    | 2.72  | 4.38  | 15.26 | ND              | ND    | 7.45  | 8.27  | 3.45  | 15.10 | ND    | ND    | 8.94        | ND    | ND    |       |
|     | <i>Sphingomonadaceae</i>   | 0.12  | 0.10  | 0.34  | ND              | ND    | 0.19  | 0.12  | 0.10  | 0.36  | ND    | ND    | 0.19        | ND    | ND    |       |
|     | <i>Staphylococcaceae</i>   | 2.65  | 0.95  | .001  | ND              | ND    | 1.20  | 0.16  | 0.68  | .01   | ND    | ND    | 0.28        | ND    | ND    |       |

<sup>a</sup> Within rows for orchard sample type, family prevalence averages with different uppercase letters are significantly different ( $P < 0.05$ ).

<sup>b</sup> ND, not determined.

Table S6. Dominant bacterial genera in the orchard microbial community of three almond orchards (AP, AC1, and AC2) as determined by next-generation sequencing

|                |                         | Relative abundance (%) of dominant bacterial genera in orchard samples at sampling times |          |           |                 |           |                    |           |          |           |           |           |                    |           |           |                    |
|----------------|-------------------------|------------------------------------------------------------------------------------------|----------|-----------|-----------------|-----------|--------------------|-----------|----------|-----------|-----------|-----------|--------------------|-----------|-----------|--------------------|
| Orchard sample | Bacterial genus         | AP                                                                                       |          |           |                 |           |                    |           | AC1      |           |           |           |                    |           | AC2       |                    |
|                |                         | July 2013                                                                                | Aug 2013 | Sept 2013 | June 2014       | July 2014 | Avg                | July 2013 | Aug 2013 | Sept 2013 | June 2014 | July 2014 | Avg                | June 2014 | July 2014 | Avg                |
| Soil           | <i>Arthrobacter</i>     | 6.10                                                                                     | 2.64     | 2.44      | 1.37            | 1.44      | 2.80 <sup>Ba</sup> | 1.57      | 1.48     | 0.62      | 1.27      | 1.18      | 1.22 <sup>C</sup>  | 4.17      | 5.15      | 4.66 <sup>A</sup>  |
|                | <i>Bacillus</i>         | 0.87                                                                                     | 0.61     | 6.04      | 4.81            | 7.22      | 3.91 <sup>A</sup>  | 0.74      | 0.82     | 1.98      | 3.00      | 2.68      | 1.84 <sup>B</sup>  | 4.07      | 4.37      | 4.22 <sup>A</sup>  |
|                | <i>Balneimonas</i>      | 2.25                                                                                     | 2.23     | 1.81      | 2.06            | 1.91      | 2.05 <sup>B</sup>  | 2.77      | 1.73     | 2.66      | 2.59      | 3.34      | 2.62 <sup>A</sup>  | 2.24      | 2.69      | 2.47 <sup>AB</sup> |
|                | <i>Brevibacterium</i>   | 0.07                                                                                     | 0.03     | 0.01      | 0.06            | 0.07      | 0.05 <sup>A</sup>  | 0.03      | 0.02     | 0.001     | 0.02      | 0.02      | 0.02 <sup>B</sup>  | 0.03      | 0.03      | 0.03 <sup>B</sup>  |
|                | <i>Erwinia</i>          | 0.12                                                                                     | 0.09     | 0.71      | 0.07            | 0.08      | 0.21               | 0.10      | 0.11     | 0.16      | 0.08      | 0.07      | 0.10               | 0.12      | 0.10      | 0.11               |
|                | <i>Hymenobacter</i>     | 0.17                                                                                     | 0.08     | 0.25      | 0.53            | 0.50      | 0.31               | 0.12      | 0.08     | 0.16      | 0.69      | 0.68      | 0.35               | 0.40      | 0.42      | 0.41               |
|                | <i>Methylobacterium</i> | 0.21                                                                                     | 0.12     | 0.66      | 0.85            | 0.86      | 0.54               | 0.14      | 0.11     | 0.30      | 0.68      | 0.63      | 0.37               | 0.46      | 0.58      | 0.52               |
|                | <i>Skermanella</i>      | 2.38                                                                                     | 1.28     | 1.82      | 0.90            | 0.88      | 1.45 <sup>B</sup>  | 3.31      | 2.48     | 3.39      | 1.61      | 2.01      | 2.56 <sup>A</sup>  | 0.73      | 0.96      | 0.85 <sup>B</sup>  |
|                | <i>Sphingomonas</i>     | 1.26                                                                                     | 0.72     | 0.57      | 1.58            | 1.58      | 1.14               | 1.15      | 0.68     | 0.51      | 1.42      | 1.27      | 1.01               | 1.09      | 1.37      | 1.23               |
|                | <i>Staphylococcus</i>   | 0.12                                                                                     | 0.05     | 0.18      | 0.07            | 0.10      | 0.10 <sup>A</sup>  | 0.08      | 0.05     | 0.03      | 0.04      | 0.05      | 0.05 <sup>B</sup>  | 0.05      | 0.14      | 0.10 <sup>AB</sup> |
| Phyllo-sphere  | <i>Arthrobacter</i>     | 0.29                                                                                     | 0.42     | 0.35      | 0.39            | 0.34      | 0.36               | 0.14      | 0.35     | 0.73      | 0.49      | 0.29      | 0.40               | 0.33      | 0.26      | 0.30               |
|                | <i>Bacillus</i>         | 0.93                                                                                     | 2.30     | 1.07      | 2.24            | 2.80      | 1.87 <sup>B</sup>  | 1.11      | 4.75     | 4.11      | 4.09      | 3.01      | 3.41 <sup>A</sup>  | 2.19      | 3.32      | 2.76 <sup>AB</sup> |
|                | <i>Balneimonas</i>      | 0.12                                                                                     | 0.22     | 0.54      | 0.29            | 0.30      | 0.29 <sup>B</sup>  | 0.14      | 0.42     | 1.56      | 0.49      | 0.40      | 0.60 <sup>A</sup>  | 0.50      | 0.39      | 0.45 <sup>AB</sup> |
|                | <i>Brevibacterium</i>   | 3.24                                                                                     | 5.43     | 1.31      | 2.34            | 0.95      | 2.65 <sup>A</sup>  | 0.04      | 0.07     | 0.001     | 0.06      | 0.03      | 0.04 <sup>B</sup>  | 0.04      | 0.03      | 0.04 <sup>B</sup>  |
|                | <i>Erwinia</i>          | 0.46                                                                                     | 1.89     | 1.16      | 1.56            | 0.44      | 1.10               | 0.81      | 2.35     | 1.05      | 1.38      | 4.30      | 1.98               | 1.86      | 0.93      | 1.40               |
|                | <i>Hymenobacter</i>     | 10.98                                                                                    | 3.85     | 11.12     | 7.63            | 12.08     | 9.13 <sup>B</sup>  | 14.69     | 9.98     | 7.91      | 17.08     | 18.23     | 13.58 <sup>A</sup> | 10.38     | 16.61     | 13.50 <sup>A</sup> |
|                | <i>Methylobacterium</i> | 7.00                                                                                     | 3.75     | 10.44     | 4.91            | 6.72      | 6.56 <sup>B</sup>  | 13.21     | 9.34     | 11.09     | 6.95      | 10.64     | 10.25 <sup>A</sup> | 11.67     | 11.27     | 11.47 <sup>A</sup> |
|                | <i>Skermanella</i>      | 0.06                                                                                     | 0.05     | 0.19      | 0.07            | 0.08      | 0.09 <sup>B</sup>  | 0.07      | 0.09     | 0.63      | 0.16      | 0.12      | 0.21 <sup>A</sup>  | 0.09      | 0.11      | 0.10 <sup>A</sup>  |
|                | <i>Sphingomonas</i>     | 13.80                                                                                    | 6.45     | 13.06     | 11.38           | 16.51     | 12.24 <sup>B</sup> | 21.06     | 14.59    | 11.35     | 17.41     | 19.06     | 16.69 <sup>A</sup> | 20.70     | 18.19     | 19.45 <sup>A</sup> |
|                | <i>Staphylococcus</i>   | 4.48                                                                                     | 4.75     | 2.07      | 3.26            | 1.65      | 3.24 <sup>A</sup>  | 0.10      | 0.29     | 0.07      | 0.17      | 0.14      | 0.15 <sup>B</sup>  | 0.08      | 0.08      | 0.08 <sup>B</sup>  |
| Air            | <i>Arthrobacter</i>     | 0.07                                                                                     | 0.67     | 0.07      | ND <sup>b</sup> | ND        | 0.27               | 0.05      | 0.11     | 0.05      | ND        | ND        | 0.07               | ND        | ND        |                    |

|                         |       |      |       |    |    |                    |      |      |       |    |    |                   |    |    |
|-------------------------|-------|------|-------|----|----|--------------------|------|------|-------|----|----|-------------------|----|----|
| <i>Bacillus</i>         | 13.89 | 8.64 | 7.73  | ND | ND | 10.09 <sup>A</sup> | 3.23 | 3.67 | 8.36  | ND | ND | 5.09 <sup>B</sup> | ND | ND |
| <i>Balneimonas</i>      | 0.01  | 0.01 | 0.04  | ND | ND | 0.02               | 0.01 | 0.01 | 0.03  | ND | ND | 0.02              | ND | ND |
| <i>Brevibacterium</i>   | 0.02  | 0.01 | 0.001 | ND | ND | 0.01               | 0.02 | 0.02 | 0.001 | ND | ND | 0.01              | ND | ND |
| <i>Erwinia</i>          | 4.75  | 3.94 | 7.31  | ND | ND | 5.33               | 4.27 | 9.68 | 2.41  | ND | ND | 5.45              | ND | ND |
| <i>Hymenobacter</i>     | 0.04  | 0.05 | 0.09  | ND | ND | 0.06               | 0.05 | 0.05 | 0.08  | ND | ND | 0.06              | ND | ND |
| <i>Methylobacterium</i> | 0.06  | 0.05 | 0.13  | ND | ND | 0.08               | 0.05 | 0.05 | 0.12  | ND | ND | 0.07              | ND | ND |
| <i>Skermanella</i>      | 0.02  | 0.01 | 0.03  | ND | ND | 0.02               | 0.02 | 0.02 | 0.03  | ND | ND | 0.02              | ND | ND |
| <i>Sphingomonas</i>     | 0.11  | 0.09 | 0.23  | ND | ND | 0.14               | 0.11 | 0.09 | 0.22  | ND | ND | 0.14              | ND | ND |
| <i>Staphylococcus</i>   | 2.43  | 0.55 | 0.71  | ND | ND | 1.23 <sup>A</sup>  | 0.12 | 0.13 | 0.06  | ND | ND | 0.10 <sup>B</sup> | ND | ND |

<sup>a</sup> Within rows for orchard sample type, genus prevalence averages with different uppercase letters are significantly different ( $P < 0.05$ ).

<sup>b</sup> ND, not determined.



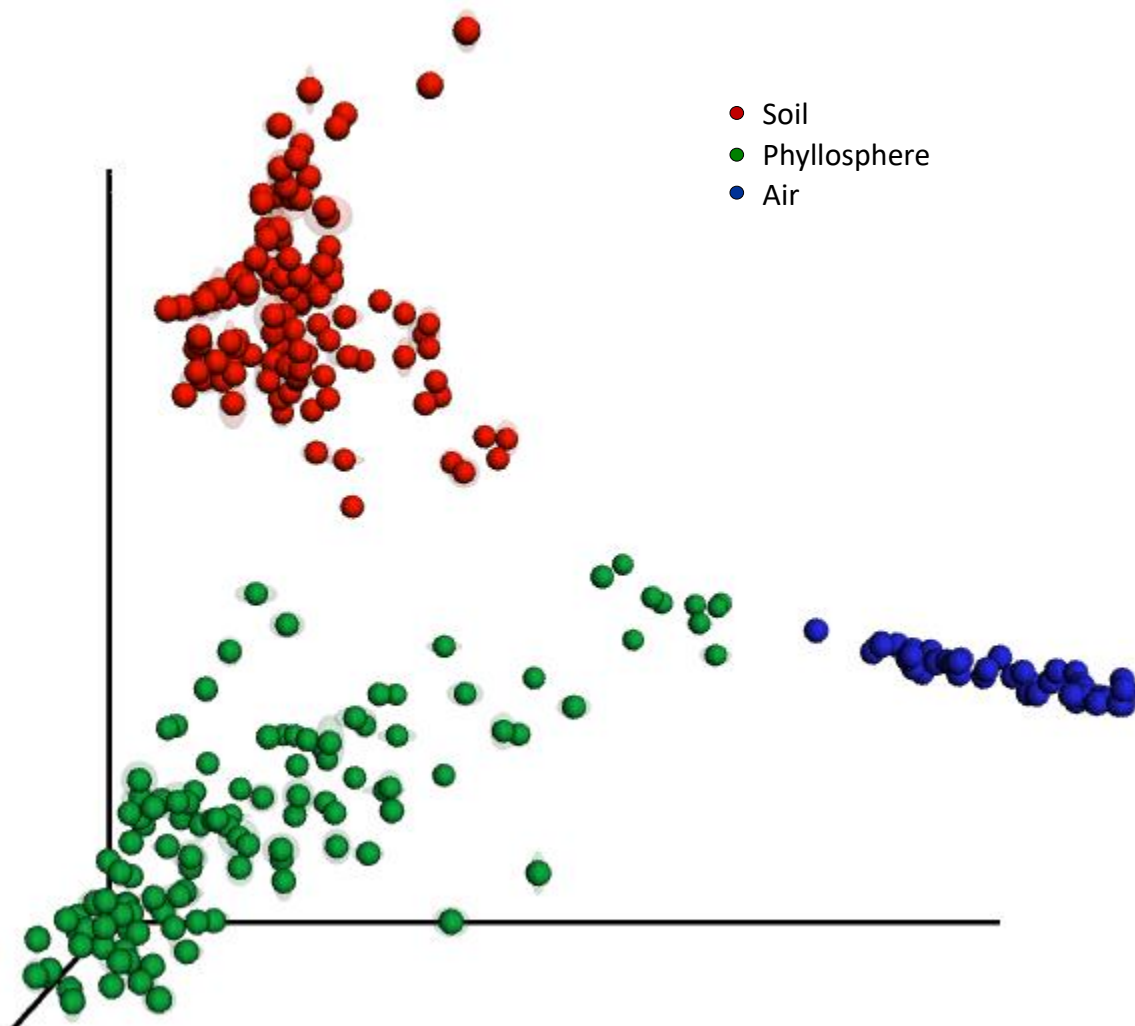

Figure S1. Principle coordinate analysis of almond orchard samples (soil, phyllosphere, air) using the weighted UniFrac community distance metric. Air,  $n = 50$ ; Phyllosphere,  $n = 125$ ; Soil,  $n = 113$ .

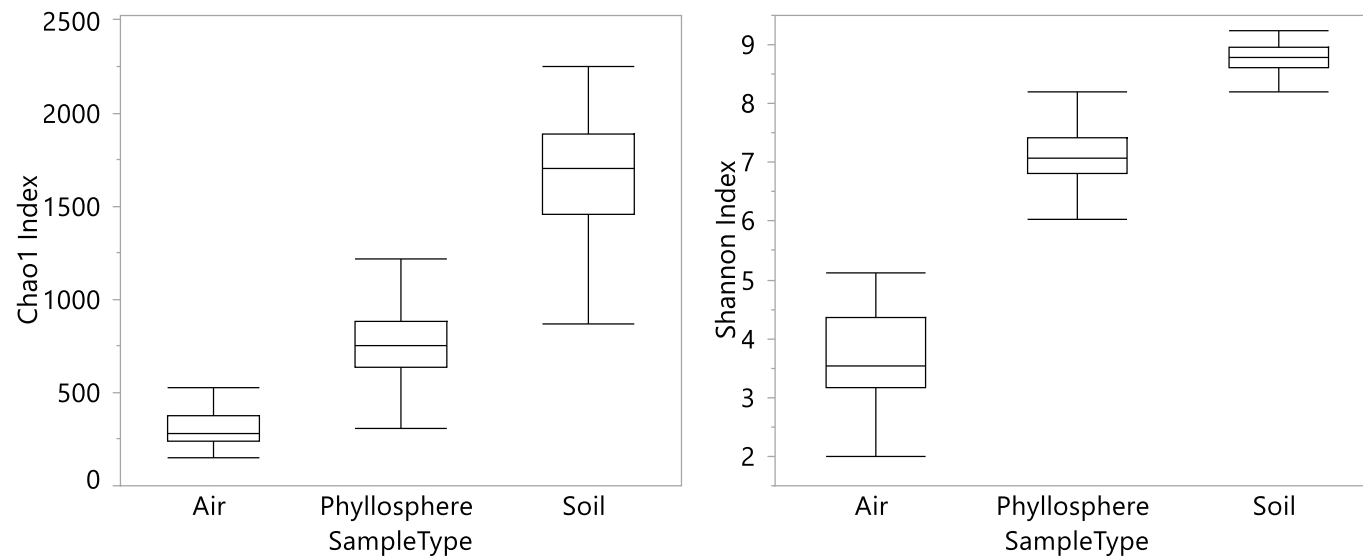

Figure S2. Box plots showing the alpha diversity of the microbial communities in air, phyllosphere, and soil samples as measured by Chao1 and Shannon index. Air: AP,  $n = 27$ ; AC1,  $n = 23$ ; AC2. Phyllosphere: AP,  $n = 63$ ; AC1,  $n = 44$ ; AC2,  $n = 18$ . Soil: AP,  $n = 50$ ; AC1,  $n = 45$ ; AC2,  $n = 18$ .

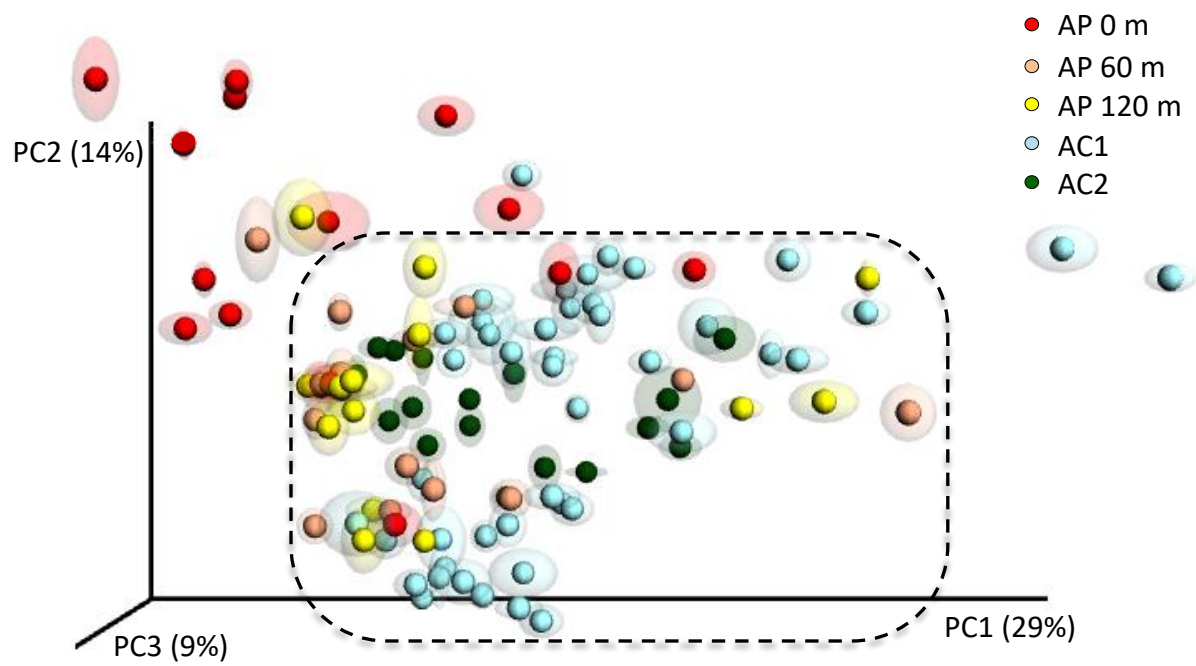

Figure S3. Principle coordinate analysis of almond orchard soil samples using the weighted UniFrac community distance metric. AP,  $n = 50$ ; AC1,  $n = 45$ ; AC2,  $n = 18$ .

### A. Phyla

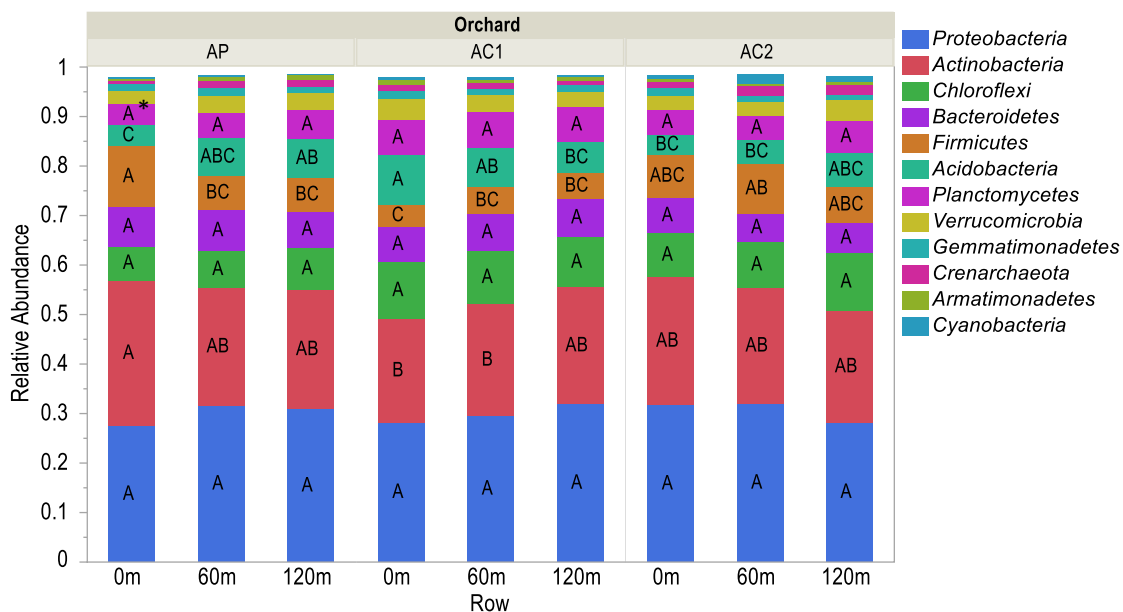

### B. Families

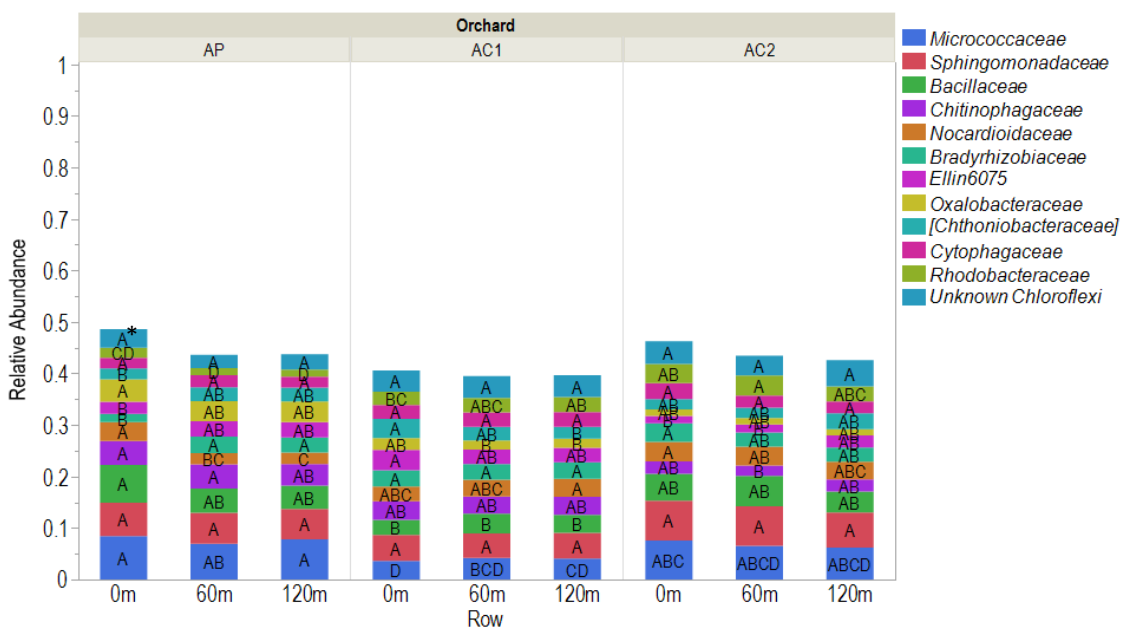

Figure S4. Relative abundance of the top 12 bacterial (A) phyla and (B) families in orchard soil samples. AP,  $n = 50$ ; AC1,  $n = 45$ ; AC2,  $n = 18$ .

\*Within a phylum or family, different letters indicate significant differences in relative abundance among orchard rows. Statistical analysis is shown for the 12 families and the most dominant phyla

### A. Phyla

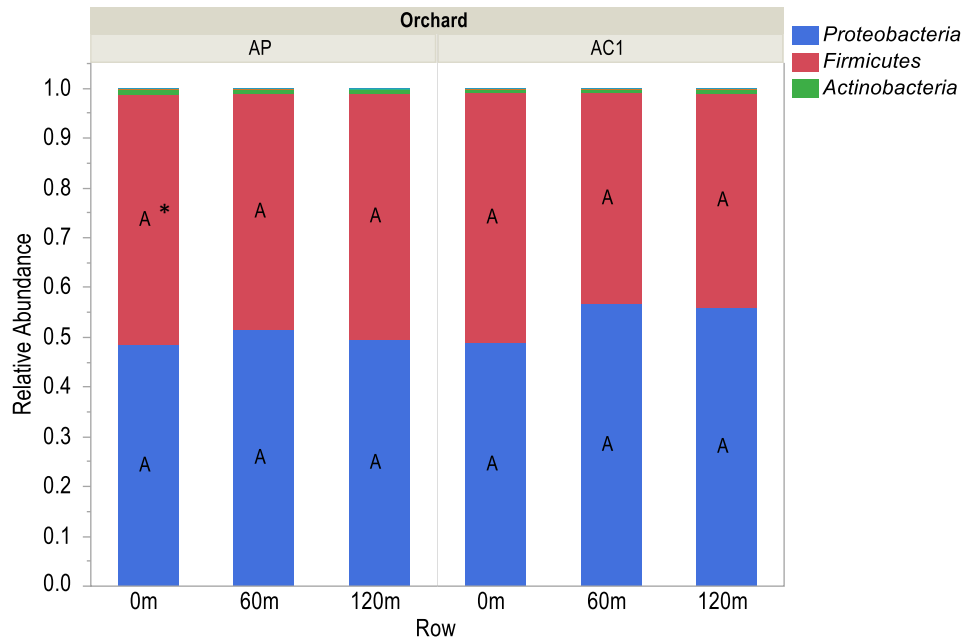

### B. Families

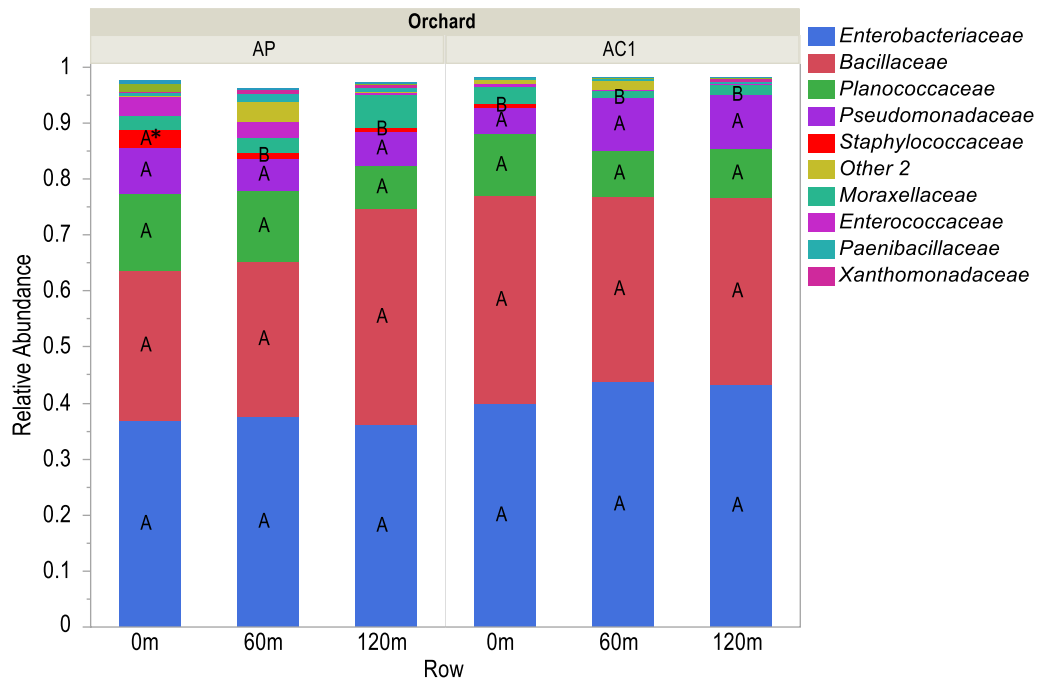

Figure S5. Relative abundance of the top 12 bacterial (A) phyla and (B) families in orchard air samples. AP,  $n = 23$ ; AC1,  $n = 27$ .

\*Within a phylum or family, different letters indicate significant differences in relative abundance among orchard rows. Statistical analysis is shown for the 12 families and the most dominant phyla.

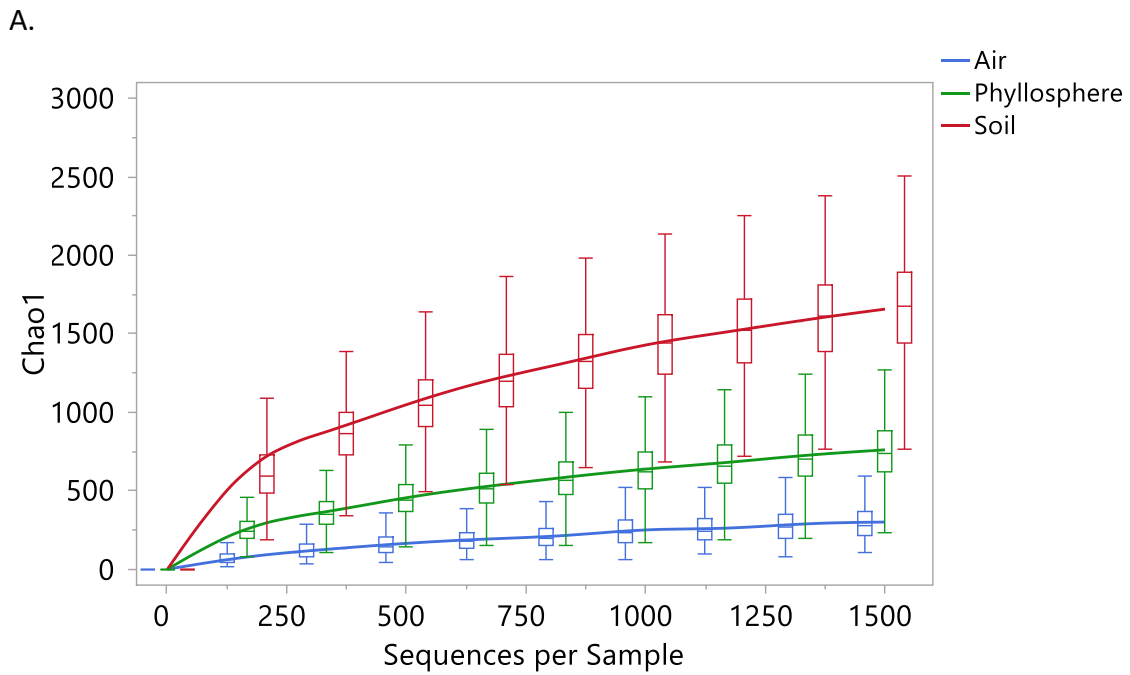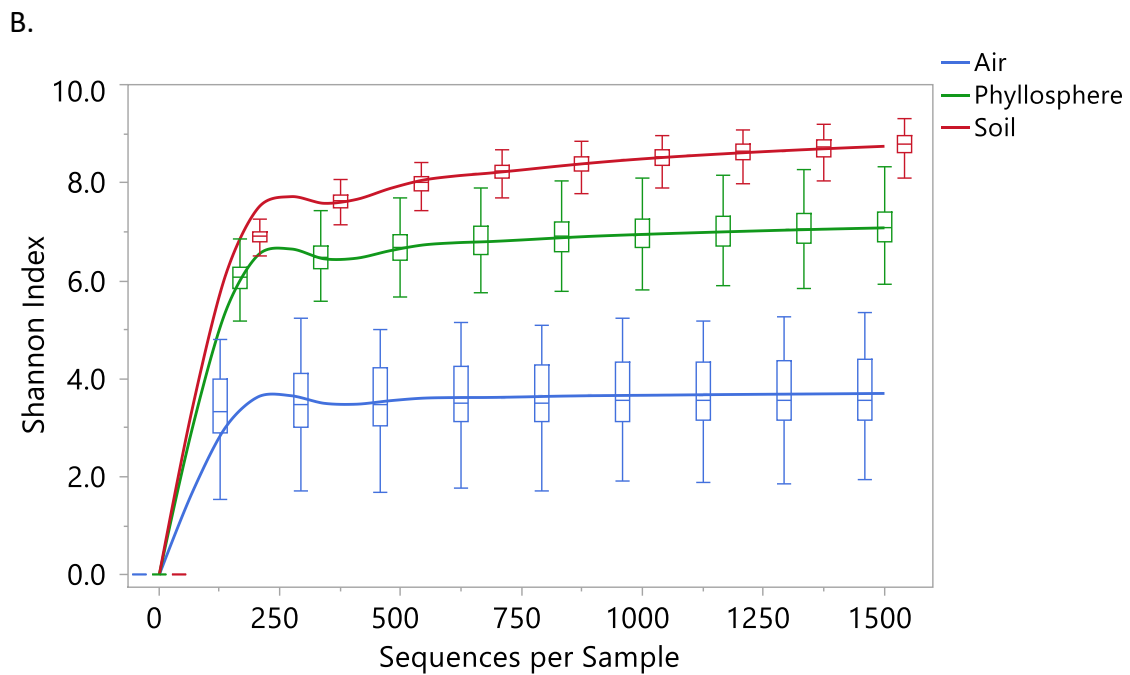

Figure S6. The alpha diversity metric Chao1 (A) and Shannon Index (B) by sequences per sample. Air,  $n = 50$ ; Phyllosphere,  $n = 125$ ; Soil,  $n = 113$ .
